# Supplementary material for: Brain-Wide Mapping of Afferent Inputs to Accumbens Nucleus Core Subdomains and Accumbens Nucleus Subnuclei
Source: Front Syst Neurosci. 2020 Mar 18;14:15. doi: 10.3389/fnsys.2020.00015 (PMC7150367; doi:10.3389/fnsys.2020.00015)
Supplement: Supplementary file 1 [file Table_1.xlsx]

## Sheet: Sheet1
	Major area	Brain regions	F(2,17)	Oneway p value	NAcC vs NAcLS	NAcC vs NAcMS	NAcLS vs NAcMS
1	Isocortex	MO	7.274	0.0052	**	NS	*
2	Isocortex	SS	11.8	0.0006	**	NS	**
3	Isocortex	GU	60.63	<0.0001	****	NS	****
4	Isocortex	VISC	5.854	0.116	*	NS	*
5	Isocortex	AUD	6.984	0.0061	NS	*	**
6	Isocortex	ACA	0.8395	0.4491	NS	NS	NS
7	Isocortex	PL	3.846	0.0419	NS	*	NS
8	Isocortex	ILA	2.597	0.1037	NS	NS	NS
9	Isocortex	ORB	3.498	0.0534	NS	*	NS
10	Isocortex	AI	40.52	<0.0001	****	NS	****
11	Isocortex	TEA	11.67	0.0006	NS	**	***
12	Isocortex	PERI	33.33	<0.0001	****	*	****
13	Isocortex	ECT	18.61	<0.0001	**	*	****
14	OLF	MOB	2.169	0.1448	NS	NS	NS
15	OLF	AON	5.258	0.0167	*	*	NS
16	OLF	TT	4.023	0.0371	*	NS	NS
17	OLF	DP	2.555	0.1071	NS	NS	NS
18	OLF	PIR	17.16	<0.0001	**	NS	****
19	OLF	NLOT	6.602	0.0076	NS	**	NS
20	OLF	COA	6.652	0.0073	NS	*	*
21	OLF	PAA	2.58	0.105	NS	NS	NS
22	OLF	TR	9.572	0.0016	NS	**	**
23	HPF	CA1	6.229	0.0093	NS	*	**
24	HPF	CA3	4.712	0.0235	NS	*	*
25	HPF	DG	2.968	0.0784	NS	NS	NS
26	HPF	ENTl	2.968	0.0784	NS	NS	NS
27	HPF	ENTm	24.8	<0.0001	NS	****	****
28	HPF	SUB	42.46	<0.0001	****	NS	****
29	CTXsp	CLA	11.83	0.0006	**	NS	**
30	CTXsp	EP	3.245	0.064	NS	NS	NS
31	CTXsp	LA	9.947	0.0014	NS	**	NS
32	CTXsp	BLA	0.2842	0.7561	NS	NS	NS
33	CTXsp	BMA	9.696	0.0016	NS	**	**
34	CTXsp	PA	10.47	0.0011	NS	**	**
35	STR	CP	4.407	0.0287	NS	NS	*
36	STR	OT	1.337	0.2889	NS	NS	NS
37	STR	LS	18.61	<0.0001	NS	****	***
38	STR	AAA	4.614	0.0251	NS	*	NS
39	STR	CEA	4.913	0.0207	NS	*	NS
40	STR	IA	14.37	0.0002	NS	***	**
41	STR	MEA	38.66	<0.0001	NS	****	****
42	PAL	SI	4.101	0.0352	NS	NS	*
43	PAL	MSC	32.2	<0.0001	NS	****	****
44	PAL	BST	25.49	<0.0001	NS	****	****
45	TH	VENT	0.7272	0.4977	NS	NS	NS
46	TH	ATN	5.523	0.0142	*	*	NS
47	TH	IMD	7.356	0.005	NS	*	**
48	TH	MD	8.782	0.0024	NS	**	*
49	TH	SMT	3.662	0.0476	NS	NS	NS
50	TH	PVT	2.771	0.0909	NS	NS	NS
51	TH	PT	1.556	0.2396	NS	NS	NS
52	TH	RE	1.101	0.3552	NS	NS	NS
53	TH	RH	4.315	0.0305	NS	*	NS
54	TH	CM	0.4657	0.6355	NS	NS	NS
55	TH	PF	2.448	0.1163	NS	NS	NS
56	TH	EPI	1.496	0.2521	NS	NS	NS
57	HY	ARH	13.44	0.0003	NS	***	**
58	HY	DMH	13.22	0.0003	NS	***	**
59	HY	MPO	12.41	0.0005	NS	***	**
60	HY	AHN	14.3	0.0002	NS	***	**
61	HY	MBO	5.838	0.0117	NS	*	*
62	HY	MPN	7.177	0.0055	NS	**	*
63	HY	PMd	5.326	0.016	NS	*	*
64	HY	PMv	40.7	<0.0001	NS	****	****
65	HY	VMH	11	0.0009	NS	**	**
66	HY	PH	13.45	0.0003	NS	***	**
67	HY	LHA	47.32	<0.0001	NS	****	****
68	HY	LPO	6.386	0.0085	NS	*	*
69	HY	TU	14.75	0.0002	NS	***	***
70	HY	ZI	11.45	0.0001	NS	**	**
71	MB	VTA	2.618	0.102	NS	NS	NS
72	MB	MRN	1.004	0.3872	NS	NS	NS
73	MB	PAG	2.007	0.165	NS	NS	NS
74	MB	RN	0.03859	0.9622	NS	NS	NS
75	MB	RAmb	7.376	0.0049	NS	**	*
