# Supplementary material for: Brain-Wide Mapping of Afferent Inputs to Accumbens Nucleus Core Subdomains and Accumbens Nucleus Subnuclei
Source: Front Syst Neurosci. 2020 Mar 18;14:15. doi: 10.3389/fnsys.2020.00015 (PMC7150367; doi:10.3389/fnsys.2020.00015)
Supplement: Supplementary file 2 [file Table_2.xlsx]

## Sheet: Sheet1
	Sample Number	rNAcC-01	rNAcC-02	rNAcC-03	rNAcC-04	rNAcC-05	cNAcC-01	cNAcC-02	cNAcC-03	cNAcC-04	cNAcC-05	vNAcC-01	vNAcC-02	vNAcC-03	vNAcC-04	dNAcC-01	dNAcC-02	dNAcC-03	dNAcC-04	NAcMS-01	NAcMS-02	NAcMS-03	NAcMS-04	NAcMS-05	NAcLS-01	NAcLS-02	NAcLS-03	NAcLS-04	NAcLS-05	NAcC-01	NAcC-02	NAcC-03	NAcC-04	NAc-C05	NAcS-01	NAcS-02	NAcS-03	NAcS-04	NAcS-05
Brain areas	Brain regions(Abbreviations)	Cell number (inputs)					Cell number (inputs)					Cell number (inputs)				Cell number (inputs)				Cell number (inputs)					Cell number (inputs)					Cell number (co-labeled)					Cell number (co-labeled)
Isocortex	Somatomotor areas(MO)	4	18	5	0	22	10	2	118	480	4	4	5	0	22	10	118	480	4	2	0	0	0	0	301	761	130	61	1182	0	0	0	0	0	0	0	0	0	0
	Somatosensory areas(SS)	0	28	0	0	2	0	27	3	42	2	0	0	0	2	0	3	42	2	0	0	0	0	0	67	185	133	63	16	0	0	0	0	0	0	0	0	0	0
	Gustatory areas(GU)	4	99	22	60	61	30	0	249	161	182	4	22	60	61	30	249	161	182	1	0	1	0	1	548	478	648	403	311	0	0	0	0	8	0	0	0	0	0
	Visceral area(VISC)	2	10	15	6	10	6	0	78	208	66	2	15	6	10	6	78	208	66	1	0	2	1	0	59	326	124	500	76	0	0	0	0	1	0	0	0	0	0
	Auditory areas(AUD)	18	4	22	7	51	55	0	212	147	114	18	22	7	51	55	212	147	114	0	7	7	0	0	68	105	39	65	84	1	0	0	0	7	0	0	0	0	0
	Visual areas(VIS)	3	0	0	0	10	0	0	3	45	0	3	0	0	10	0	3	45	0	0	0	0	0	7	0	0	0	0	7	0	0	0	0	0	0	0	0	0	0
	Anterior cingulate area(ACA)	45	1	1	13	179	60	0	278	1357	2	45	1	13	179	60	278	1357	2	29	6	0	10	0	31	31	31	11	235	2	0	0	0	0	0	0	0	0	0
	Prelimbic area(PL)	289	107	198	163	718	1085	0	937	1191	439	289	198	163	718	1085	937	1191	439	69	31	11	0	1	71	78	84	5	645	118	0	5	10	13	0	0	0	0	0
	Infralimbic area(ILA)	34	54	30	111	595	761	5	1362	2239	732	34	30	111	595	761	1362	2239	732	290	143	100	283	124	62	86	44	69	76	0	0	0	0	19	0	0	1	1	0
	Orbital area(ORB)	302	886	195	303	1200	1342	8	653	1163	784	302	195	303	1200	1342	653	1163	784	18	108	15	93	28	44	182	171	110	1293	105	0	1	3	30	2	3	0	0	0
	Agranular insular area(AI)	116	124	389	222	260	414	3	1454	601	781	116	389	222	260	414	1454	601	781	8	0	23	5	9	1320	2000	1223	856	2177	11	0	3	2	18	0	0	0	0	0
	Retrosplenial(RSP)	0	0	0	0	0	0	0	0	24	0	0	0	0	0	0	0	24	0	0	0	0	0	0	0	0	0	0	0	0	0	0	0	0	0	0	0	0	0
	Posterior parietal association areas(PTLp)	0	0	0	0	6	0	0	5	8	0	0	0	0	6	0	5	8	0	0	0	0	0	0	0	0	0	0	1	0	0	0	0	0	0	0	0	0	0
	Temporal association areas(TEa)	80	91	160	81	247	173	0	415	545	396	80	160	81	247	173	415	545	396	6	25	10	5	4	365	426	224	102	187	13	0	3	3	34	0	0	0	0	0
	Perirhinal area(PERI)	132	90	209	46	137	137	4	302	279	293	132	209	46	137	137	302	279	293	7	37	17	0	26	549	486	454	258	391	27	0	1	0	17	0	0	0	0	0
	Ectorhinal area(ECT)	177	131	210	71	153	204	4	445	420	334	177	210	71	153	204	445	420	334	13	28	9	9	29	813	643	378	251	301	27	0	4	0	25	0	0	1	1	0
Olfactory areas(OLF)	Main olfactory bulb(MOB)	0	238	26	54	46	41	167	0	0	58	0	26	54	46	41	0	0	58	0	0	0	0	0	0	0	0	0	0	0	8	0	0	0	0	0	0	0	0
	Anterior olfactory nucleus(AON)	2957	3377	1030	1992	2693	159	2884	14	21	2946	2957	1030	1992	2693	159	14	21	2946	39	70	134	33	13	9	18	15	10	0	0	154	0	0	5	0	0	0	0	0
	Taenia tecta(TT)	41	75	154	193	252	26	11	324	168	210	41	154	193	252	26	324	168	210	239	166	107	274	117	7	13	57	13	16	0	0	0	0	0	0	1	0	0	0
	Dorsal peduncular area(DP)	4	29	11	21	25	61	7	397	290	113	4	11	21	25	61	397	290	113	165	83	58	189	82	4	23	25	24	3	0	0	0	0	0	0	0	0	1	0
	Piriform area(PIR)	675	155	923	660	612	523	40	738	326	2131	675	923	660	612	523	738	326	2131	7	137	96	100	26	2309	2011	2251	1537	902	18	2	8	5	18	0	0	0	1	0
	Nucleus of the lateral olfactory tract(NLOT)	0	5	0	0	2	0	0	6	0	7	0	0	0	2	0	6	0	7	33	11	14	82	0	0	14	14	6	0	0	0	0	0	0	0	0	0	0	0
	Cortical amygdalar area(COA)	24	27	9	35	22	36	51	219	500	349	24	9	35	22	36	219	500	349	116	251	134	1554	1403	133	18	53	10	85	4	0	0	1	2	0	0	0	0	0
	Piriform-amygdalar area(PAA)	19	31	29	58	39	28	3	80	138	129	19	29	58	39	28	80	138	129	10	14	37	96	21	158	63	63	7	110	2	0	1	0	2	0	0	0	0	0
	Postpiriform transition area(TR)	2	7	15	35	4	5	22	322	537	118	2	15	35	4	5	322	537	118	107	294	281	1023	529	86	4	23	121	10	0	0	0	0	0	0	0	0	3	0
Hippocampal formation(HPF)	Hippocampal field CA1(CA1)	223	314	131	17	301	8	8	250	165	490	223	131	17	301	8	250	165	490	298	892	240	623	564	126	45	192	19	1	0	0	1	0	9	0	0	0	0	0
	Hippocampal field CA3(CA3)	0	0	0	0	31	0	0	0	1	56	0	0	0	31	0	0	1	56	12	44	1	205	513	0	0	0	0	0	0	0	0	0	0	0	0	0	0	0
	Dentate gyrus(DG)	2	0	0	0	0	0	0	1	7	13	2	0	0	0	0	1	7	13	21	0	0	0	83	0	0	0	0	0	0	0	0	0	0	0	0	0	0	0
	Lateral entorhinal area(ENTl)	163	224	268	158	311	227	126	1048	1361	1107	163	268	158	311	227	1048	1361	1107	134	360	520	233	1471	764	717	698	500	557	14	2	4	2	32	0	1	0	0	0
	Medial entorhinal area(ENTm)	5	3	0	0	19	0	4	140	150	64	5	0	0	19	0	140	150	64	140	230	227	290	853	45	23	3	0	0	0	0	0	0	5	0	0	0	0	0
	Subiculum(SUB)	257	84	23	14	292	29	0	468	470	797	257	23	14	292	29	468	470	797	830	1262	1300	1967	4058	48	16	76	87	18	0	0	0	2	11	0	1	1	4	0
Cortical subplate(CTXsp)	Claustrum(CLA)	6	4	5	3	25	7	0	54	47	83	6	5	3	25	7	54	47	83	5	0	7	4	36	148	61	56	36	38	0	0	0	0	2	0	0	0	0	0
	Endopiriform nucleus(EP)	54	32	131	179	118	105	9	355	391	515	54	131	179	118	105	355	391	515	107	83	165	119	107	261	264	332	178	149	2	0	3	1	10	3	1	0	0	0
	Lateral amygdalar nucleus(LA)	158	91	93	51	112	121	2	526	355	596	158	93	51	112	121	526	355	596	0	0	0	0	0	116	133	92	53	88	53	0	5	1	9	0	0	0	0	0
	Basolateral amygdalar nucleus(BLA)	164	282	253	96	389	389	57	1172	1327	1475	164	253	96	389	389	1172	1327	1475	204	532	800	1136	434	753	606	599	407	127	47	1	11	5	45	0	4	1	3	0
	Basomedial amygdalar nucleus(BMA)	81	102	73	78	166	135	63	898	682	1038	81	73	78	166	135	898	682	1038	404	455	1079	1874	808	313	106	129	113	148	11	0	0	0	26	1	0	1	2	0
	Posterior amygdalar nucleus(PA)	0	0	0	8	0	0	0	29	132	49	0	0	8	0	0	29	132	49	17	307	63	842	616	0	0	0	12	6	0	0	0	0	0	0	0	0	0	0
Striatum(STR)	Caudoputamen(CP)	9	41	25	272	126	294	12	458	774	164	9	25	272	126	294	458	774	164	137	94	240	105	93	705	339	230	571	262	0	0	1	1	0	5	3	0	0	0
	Fundus of striatum(FS)	0	0	0	0	0	0	1	0	1	0	0	0	0	0	0	0	1	0	0	7	4	1	0	15	3	0	0	0	0	0	0	0	0	0	0	0	0	0
	Olfactory tubercle(OT)	0	13	0	55	8	0	26	0	0	119	0	0	55	8	0	0	0	119	20	6	8	12	0	8	8	1	0	1	0	2	0	0	0	0	0	0	0	0
	Lateral septal nucleus(LS)	0	0	2	2	8	0	1	76	48	34	0	2	2	8	0	76	48	34	2876	1770	463	1367	1949	0	0	0	0	0	0	0	0	0	0	0	0	0	0	0
	Septofimbrial nucleus(SF)	0	0	0	0	0	0	0	0	0	0	0	0	0	0	0	0	0	0	26	0	0	19	4	0	0	0	0	0	0	0	0	0	0	0	0	0	0	0
	Septohippocampl nucleus(SH)	0	0	0	0	0	0	0	0	0	0	0	0	0	0	0	0	0	0	11	3	4	4	12	0	0	0	0	0	0	0	0	0	0	0	0	0	0	0
	Anterior amygdalar area(AAA)	0	0	0	0	0	0	0	1	3	1	0	0	0	0	0	1	3	1	9	8	10	71	0	9	8	0	4	0	0	0	0	0	0	0	0	0	0	0
	Bed nucleus of the accessory olfactory tract(BA)	0	5	0	0	0	0	0	0	0	0	0	0	0	0	0	0	0	0	6	2	1	24	6	0	0	0	0	0	0	0	0	0	0	0	0	0	0	0
	Central amygdalar nucleus(CEA)	0	13	1	1	2	1	1	26	50	13	0	1	1	2	1	26	50	13	158	108	698	299	56	24	89	70	8	0	0	0	0	0	0	0	0	1	1	0
	Intercalated amygdalar nucleus(IA)	5	0	4	4	6	1	0	19	27	17	5	4	4	6	1	19	27	17	19	31	36	80	22	14	5	1	11	3	0	0	0	0	0	0	0	0	0	0
	Medial amygdalar nucleus(MEA)	10	8	4	5	7	4	10	209	230	126	10	4	5	7	4	209	230	126	358	151	247	641	526	23	17	7	1	77	0	0	0	0	0	0	0	0	0	0
Pallidum(PAL)	Globus pallidus, external segment(GPe)	0	0	0	0	0	0	0	0	3	0	0	0	0	0	0	0	3	0	1	0	24	1	0	2	1	0	0	0	0	0	0	0	0	0	0	0	0	0
	Substantia innominata(SI)	8	2	5	67	21	0	0	0	0	99	8	5	67	21	0	0	0	99	224	76	74	48	9	1	8	0	1	0	0	0	0	0	0	0	0	0	0	0
	Medial septal complex(MSC)	0	0	0	0	0	0	0	0	0	0	0	0	0	0	0	0	0	0	71	75	24	41	75	0	0	0	0	0	0	0	0	0	0	0	0	0	0	0
	Bed nuclei of the stria terminalis(BST)	2	4	0	0	0	0	6	39	0	37	2	0	0	0	0	39	0	37	278	118	109	172	152	0	0	0	0	0	0	0	0	0	0	0	0	0	0	0
Thalamus(TH)	Ventral group of the dorsal thalamus(VENT)	1	0	0	3	0	5	0	16	70	7	1	0	3	0	5	16	70	7	5	1	0	15	0	6	3	9	20	7	0	0	0	0	0	0	0	0	0	0
	Lateral group of the dorsal thalamus(LAT)	0	0	0	0	0	0	0	1	1	0	0	0	0	0	0	1	1	0	0	0	0	0	0	1	5	4	0	0	0	0	0	0	0	0	0	0	0	0
	Anterior group of the dorsal thalamus(ATN)	68	73	11	7	256	94	5	254	169	37	68	11	7	256	94	254	169	37	0	0	5	1	49	0	0	1	0	8	4	0	0	0	2	0	0	0	0	0
	Intermediodorsal nucleus of the thalamus(IMD)	46	35	48	44	16	75	0	165	134	79	46	48	44	16	75	165	134	79	14	8	0	13	30	50	99	96	34	142	4	0	0	0	1	0	0	0	0	0
	Mediodorsal nucleus of thalamus(MD)	182	170	50	100	99	210	5	399	441	94	182	50	100	99	210	399	441	94	3	3	9	6	34	148	183	120	89	123	35	1	4	3	6	0	0	0	0	0
	Submedial nucleus of the thalamus(SMT)	2	1	8	3	0	8	0	35	57	22	2	8	3	0	8	35	57	22	0	1	0	0	0	1	1	0	5	0	0	0	0	0	0	0	0	0	0	0
	Paraventricular nucleus of the thalamus(PVT)	199	244	169	232	230	291	38	756	778	1383	199	169	232	230	291	756	778	1383	57	81	227	67	646	232	286	331	387	142	42	4	3	5	30	0	0	0	0	0
	Parataenial nucleus(PT)	10	30	10	29	80	9	0	105	50	409	10	10	29	80	9	105	50	409	20	23	29	10	165	2	0	3	1	23	0	0	0	0	19	0	0	0	0	0
	Nucleus of reuniens(RE)	15	8	8	47	41	36	0	166	103	230	15	8	47	41	36	166	103	230	43	27	25	35	180	14	14	37	12	32	1	0	0	0	0	0	0	0	0	0
	Rhomboid nucleus(RH)	6	8	11	4	5	16	0	70	57	37	6	11	4	5	16	70	57	37	6	1	0	6	0	19	11	16	15	25	0	0	0	0	0	0	0	0	0	0
	Central medial nucleus of the thalamus(CM)	55	56	0	0	0	63	0	12	23	0	55	0	0	0	63	12	23	0	32	1	20	4	0	32	28	25	44	2	3	0	0	0	0	0	0	0	0	0
	Central lateral nucleus of the thalamus(CL)	5	0	0	1	13	3	0	13	59	0	5	0	1	13	3	13	59	0	0	0	0	0	0	0	0	0	0	0	0	0	0	0	0	0	0	0	0	0
	Parafascicular nucleus(PF)	92	58	37	1	53	95	0	127	98	46	92	37	1	53	95	127	98	46	3	0	0	0	32	8	62	15	50	241	6	0	0	0	5	0	0	0	0	0
	Reticular nucleus of the thalamus(RT)	0	0	0	0	0	3	0	0	0	10	0	0	0	0	3	0	0	10	1	0	12	0	11	0	0	0	0	0	0	0	0	0	0	0	0	0	0	0
	Epithalamus(EPI)	14	9	3	8	40	12	0	24	61	72	14	3	8	40	12	24	61	72	98	2	8	1	19	5	2	0	0	0	2	0	0	0	3	0	0	0	0	0
Hypothalamus(HY)	Paraventricular hypothalamic nucleus(PVH)	0	0	0	2	0	1	0	0	5	0	0	0	2	0	1	0	5	0	14	8	5	18	33	0	0	0	0	0	0	0	0	0	0	0	0	0	0	0
	Arcuate hypothalamic nucleus(ARH)	0	0	0	0	0	0	0	0	14	0	0	0	0	0	0	0	14	0	20	11	48	23	32	0	0	0	0	0	0	0	0	0	0	0	0	0	0	0
	Anteroventral periventricular nucleus(AVPV)	0	0	0	0	0	0	0	0	0	0	0	0	0	0	0	0	0	0	10	21	26	1	1	0	0	0	0	0	0	0	0	0	0	0	0	0	0	0
	Dorsomedial nucleus of the hypothalamus(DMH)	0	0	0	3	1	0	0	1	48	5	0	0	3	1	0	1	48	5	167	33	78	51	100	0	0	0	0	0	0	0	0	0	0	0	0	0	0	0
	Medial preoptic area(MPO)	0	0	0	0	0	0	0	0	0	0	0	0	0	0	0	0	0	0	83	31	38	14	28	0	0	0	0	0	0	0	0	0	0	0	0	0	0	0
	Paraventricular hypothalamic nucleus,posterior part(PVp)	0	0	0	0	0	0	0	0	0	0	0	0	0	0	0	0	0	0	1	5	11	8	32	0	0	0	0	0	0	0	0	0	0	0	0	0	0	0
	Anterior hypothalamic nucleus(AHN)	0	0	0	0	0	0	0	0	0	0	0	0	0	0	0	0	0	0	79	40	16	9	134	0	0	0	0	0	0	0	0	0	0	0	0	0	0	0
	Main olfactory bulb(MBO)	0	0	4	13	0	0	0	0	16	16	0	4	13	0	0	0	16	16	43	10	14	24	191	0	0	0	0	0	0	0	0	0	0	0	0	0	0	0
	Medial preoptic nucleus(MPN)	0	0	0	0	0	0	0	0	0	0	0	0	0	0	0	0	0	0	109	47	6	7	60	0	0	0	0	0	0	0	0	0	0	0	0	0	0	0
	Dorsal premammillary nucleus(PMd)	0	0	0	0	0	0	0	8	0	1	0	0	0	0	0	8	0	1	4	11	10	14	108	0	0	0	0	0	0	0	0	0	0	0	0	0	0	0
	Ventral premammillary nucleus(PMv)	0	0	0	0	0	0	0	0	0	4	0	0	0	0	0	0	0	4	30	99	58	107	81	0	0	0	0	0	0	0	0	0	0	0	0	0	0	0
	Ventromedial hypothalamic nucleus(VMH)	0	0	0	3	0	0	0	0	13	0	0	0	3	0	0	0	13	0	242	63	72	241	3	0	0	0	0	0	0	0	0	0	0	0	0	0	0	0
	Posterior hypothalamic nucleus(PH)	0	0	0	0	0	6	0	0	20	2	0	0	0	0	6	0	20	2	154	99	27	63	61	0	0	0	0	0	0	0	0	0	0	0	0	0	0	0
	Lateral hypothalamic area(LHA)	0	0	0	0	1	0	0	28	32	6	0	0	0	1	0	28	32	6	346	271	229	171	303	0	0	0	0	0	0	0	0	0	0	0	0	0	0	0
	Lateral preoptic area(LPO)	0	0	0	3	0	0	0	72	85	36	0	0	3	0	0	72	85	36	226	26	14	75	230	0	0	0	0	0	0	0	0	0	0	0	0	0	0	0
	Rerochiasmatic area(RCH)	0	0	0	0	0	0	0	0	0	0	0	0	0	0	0	0	0	0	10	12	4	0	0	0	0	0	0	0	0	0	0	0	0	0	0	0	0	0
	Subthalamic nucleus(STN)	0	0	0	0	0	0	0	0	0	0	0	0	0	0	0	0	0	0	0	4	0	16	0	0	0	0	0	0	0	0	0	0	0	0	0	0	0	0
	Tuberal nucleus(TU)	0	0	0	0	0	0	0	14	11	6	0	0	0	0	0	14	11	6	101	93	47	34	23	0	0	0	0	0	0	0	0	0	0	0	0	0	0	0
	Zona incerta(ZI)	0	0	0	0	4	2	0	0	6	1	0	0	0	4	2	0	6	1	7	5	8	19	0	0	0	0	0	0	0	0	0	0	0	0	0	0	0	0
Midbrain(MB)	Substantia nigra,reticular part(SNr)	11	0	0	0	3	3	0	0	2	5	11	0	0	3	3	0	2	5	10	0	0	0	0	0	2	0	0	0	0	0	0	0	0	0	0	0	0	0
	Ventral tegmental area(VTA)	25	16	17	7	23	7	0	51	23	33	25	17	7	23	7	51	23	33	43	61	14	13	78	43	65	34	6	45	0	0	0	0	0	0	0	0	0	0
	Midbrain reticular nucleus(MRN)	17	13	10	0	0	14	19	2	7	0	17	10	0	0	14	2	7	0	10	40	21	13	2	14	52	32	16	16	0	0	0	0	0	0	0	0	0	0
	Periaqueductal gray(PAG)	12	1	0	6	0	15	1	39	158	7	12	0	6	0	15	39	158	7	91	11	0	67	89	3	0	0	29	0	0	0	0	0	0	0	0	0	0	0
	Red nucleus(RN)	62	40	0	0	0	58	30	0	0	0	62	0	0	0	58	0	0	0	29	91	40	0	0	49	73	61	0	2	0	0	0	0	0	0	0	0	0	0
	Substantia nigra, compact part(SNc)	0	0	0	0	3	0	0	2	0	0	0	0	0	3	0	2	0	0	0	0	0	0	0	10	8	0	0	8	0	0	0	0	0	0	0	0	0	0
	Midbrain raphe nuclei(RAmb)	0	0	0	0	0	0	0	9	1	1	0	0	0	0	0	9	1	1	38	61	9	8	14	0	0	0	1	0	0	0	0	0	0	0	0	0	0	0
Hindbrain(HB)	Superior central nucleus raphe(CS)	0	0	0	0	0	0	0	1	0	0	0	0	0	0	0	1	0	0	16	27	2	0	4	0	1	0	0	0	0	0	0	0	0	0	0	0	0	0
	Pontine reticular nucleus(PRNr)	0	3	0	0	0	4	7	0	0	0	0	0	0	0	4	0	0	0	8	18	0	0	2	6	9	0	0	0	0	0	0	0	0	0	0	0	0	0
